## MINIREVIEW – Physiology &amp; Biochemistry

# Co-translational protein targeting in bacteria

Ruth Steinberg<sup>1,#</sup>, Lara Knüpfner<sup>1,#</sup>, Andrea Origi<sup>1,2,#</sup>, Rossella Asti<sup>1</sup>  
and Hans-Georg Koch<sup>1,\*,†</sup>

<sup>1</sup>Institute of Biochemistry and Molecular Biology, Faculty of Medicine, Albert-Ludwigs University Freiburg, Stefan Meier Str. 17, Freiburg D-79104, Germany and <sup>2</sup>Faculty of Biology, Albert-Ludwigs-University Freiburg, Schänzlestr. 1, Freiburg D-79104, Germany

\*Corresponding author: Institute of Biochemistry and Molecular Biology, University Freiburg, Stefan Meier Str. 17, Freiburg D-79104, Germany.

Tel: +0049-761-2035250; Fax: +0049-761-203-5289; E-mail: [Hans-Georg.Koch@biochemie.uni-freiburg.de](mailto:Hans-Georg.Koch@biochemie.uni-freiburg.de)

One sentence summary: A comprehensive review of protein targeting strategies in bacteria with emphasis on the co-translational targeting by the signal recognition particle.

Editor: Lily Karamanou

†Hans-Georg Koch, <http://orcid.org/0000-0001-5913-0334>

#These authors contributed equally to this work

## ABSTRACT

About 30% of all bacterial proteins execute their function outside of the cytosol and have to be transported into or across the cytoplasmic membrane. Bacteria use multiple protein transport systems in parallel, but the majority of proteins engage two distinct targeting systems. One is the co-translational targeting by two universally conserved GTPases, the signal recognition particle (SRP) and its receptor FtsY, which deliver inner membrane proteins to either the SecYEG translocon or the YidC insertase for membrane insertion. The other targeting system depends on the ATPase SecA, which targets secretory proteins, i.e. periplasmic and outer membrane proteins, to SecYEG for their subsequent ATP-dependent translocation. While SRP selects its substrates already very early during their synthesis, the recognition of secretory proteins by SecA is believed to occur primarily after translation termination, i.e. post-translationally. In this review we highlight recent progress on how SRP recognizes its substrates at the ribosome and how the fidelity of the targeting reaction to SecYEG is maintained. We furthermore discuss similarities and differences in the SRP-dependent targeting to either SecYEG or YidC and summarize recent results that suggest that some membrane proteins are co-translationally targeted by SecA.

**Keywords:** signal recognition particle; FtsY; SecYEG translocon; YidC; protein targeting; SecA

## INTRODUCTION

The remarkable metabolic plasticity of bacterial cells depends on the spatial and temporal coordination of multiple molecular processes that allow bacteria to rapidly adapt to their constantly changing environment. Coordination of protein transport processes is a crucial part of this adaptation. It depends on a variety of sophisticated protein delivery systems that maintain cellular integrity by routing proteins from the cytosol to their correct destination within the cytoplasmic membrane, the periplasmic space, the outer membrane or the extracellular space. These protein delivery systems are generally classified as co-translational, i.e. when protein transport is coupled to pro-

tein synthesis or as post-translational, i.e. when transport is disconnected from translation (Mori and Ito 2001; Driessen and Nouwen 2008; Akopian *et al.* 2013; Kudva *et al.* 2013; Rapoport, Li and Park 2017). The intrinsic advantage of co-translational targeting is the reduced risk of protein aggregation in the cytosol, and bacteria use this system primarily for aggregation-prone membrane proteins (Kuhn *et al.* 2014). A disadvantage is that transport is limited by the slow translation rate (Rodnina and Wintermeyer 2016) and as a consequence, a large portion of the anyway limited number of protein transport channels is occupied by the translating ribosome. This is different for post-translational targeting systems, which maintain substrates in a

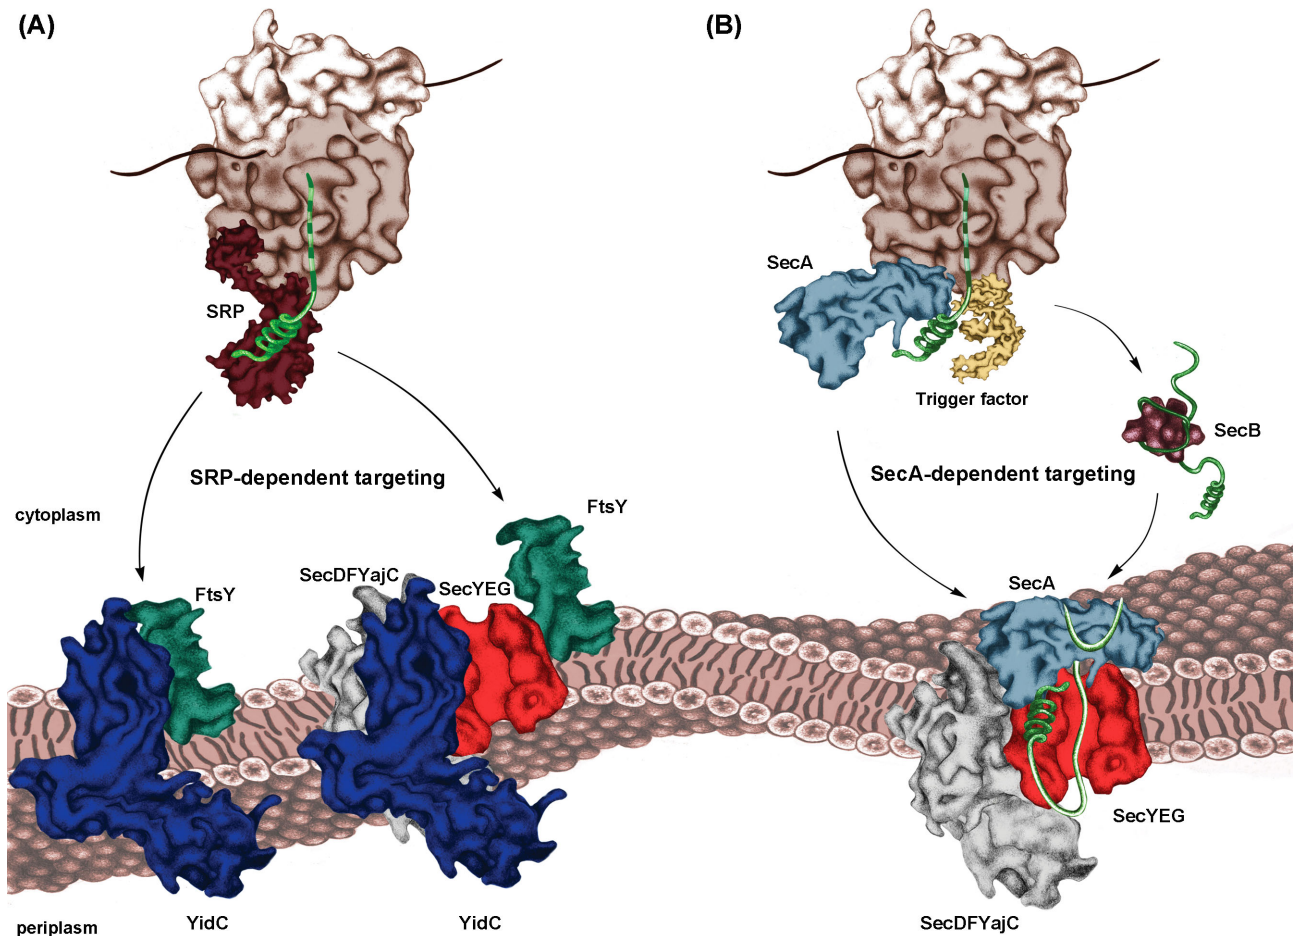

**Figure 1.** Co- and post-translational protein targeting to the SecYEG translocon and to the YidC insertase in bacteria. Bacteria use distinct pathways for the transport of inner membrane proteins or secretory proteins, i.e. periplasmic and outer membrane proteins. (A) Targeting of inner membrane proteins is initiated by the co-translational binding of SRP (dark red) to ribosomes (brown) translating a membrane protein (light green, the dotted part indicates the portion of the nascent chain that is still inside the ribosomal tunnel). The SRP-ribosome-nascent chain complex is then targeted to the SR FtsY (dark green), which is bound to the membrane-integral SecYEG translocon (red). Conformational rearrangements within the quaternary SecYEG-FtsY-SRP-RNC complex (not shown), allow docking of the RNC onto the SecYEG translocon and GTP hydrolysis by SRP and FtsY. This releases SRP back into the cytosol, while FtsY stays in contact with either SecYEG or lipids. Ongoing translation and lipid partitioning drives the insertion of TMs into the membrane. The heterotrimeric SecYEG translocon forms a protein conducting channel and associates at least transiently with additional proteins, like YidC (blue) or the SecDFYajC complex (gray). YidC assists the release of membrane proteins from the channel, while the SecDFYajC complex is thought to assist proton-motive-force-dependent steps during protein transport. SRP can deliver RNCs of membrane proteins also to YidC, but insertion via YidC is limited to membrane proteins lacking large periplasmic loops. Although FtsY can also bind to YidC, it is currently unknown whether SRP-dependent targeting to YidC follows the same principles as targeting to SecYEG. (B) Secretory proteins are first contacted by the ribosome-associated chaperone trigger factor (yellow). After their release from the ribosome they are either directly bound by the SecYEG-bound ATPase SecA (light blue), which translocates the secretory proteins post-translationally in ATP-dependent steps through the SecYEG channel. Alternatively, some secretory proteins are first bound by the secretion-specific chaperone SecB (dark brown) and only then get into contact with the SecYEG-bound SecA. During transport, the signal sequence of secretory proteins is cleaved off by signal peptidases. SecDFYajC (gray) can also associate with the translocating SecYEG translocon. Recent data demonstrate that SecA can also interact with ribosomes and RNCs, suggesting a co-translational recognition event by SecA. To which extent SecA is engaged in ribosome binding and co-translational recognition/targeting requires further analyses.

transport-competent conformation until a transport channel is available (Tsirigotaki *et al.* 2017). Typical substrates here are less hydrophobic periplasmic and outer membrane proteins, collectively called secretory proteins. As transport is separated from translation, transport is generally faster but requires an additional driving force, which is provided by ATP hydrolysis and the proton motive force (Karamanou *et al.* 1999; Tomkiewicz *et al.* 2006; Knyazev *et al.* 2018). Accessory proteins of the SecYEG translocon, like the SecDFYajC complex probably further aid the translocation process (Tsukazaki *et al.* 2011; Fig. 1).

The best studied system for co-translational targeting depends on the signal recognition particle (SRP) and its receptor, termed FtsY in bacteria. The SRP system was initially identified

in eukaryotic cells for protein transport into the endoplasmic reticulum and only later homologues in bacteria and archaea were discovered (Bernstein *et al.* 1989; Romisch *et al.* 1989; Pohlschroder *et al.* 2005; Yuan *et al.* 2010). The contribution of the bacterial SRP system to protein transport was initially controversially discussed (Johnson, Murphy and Beckwith 1992) and only after the development of purified systems the importance of the bacterial SRP for membrane protein targeting was established (Luirink *et al.* 1994; Powers and Walter 1997; Valent *et al.* 1998; Koch *et al.* 1999; Table 1). The intrinsic feature of SRP to bind to ribosomes in prokaryotes and eukaryotes (Pool *et al.* 2002; Gu *et al.* 2003; Halic *et al.* 2004; Schaffitzel *et al.* 2006) allows it to scan translating ribosomes for correct substrates.

SRP then initiates targeting of ribosome-associated nascent chains (RNCs) to the membrane-bound FtsY and ultimately to either the SecYEG translocon (Valent et al. 1998; Koch et al. 1999) or the YidC insertase (Facey et al. 2007; Welte et al. 2012) for co-translational insertion into the membrane (Fig. 1). Although SecYEG (Baba et al. 1990; Koch and Muller 2000) and YidC (Samuelson et al. 2000; Chen et al. 2002; Dalbey, Koch and Kuhn 2017) can act as independent insertion sites for membrane proteins, they also cooperate during membrane protein insertion (Scotti et al. 2000; Beck et al. 2001; Houben et al. 2004; Zhu et al. 2012; Sachelaru et al. 2013; Komar et al. 2016; Sachelaru et al. 2017; Petriman et al. 2018). Here, YidC facilitates the release of transmembrane domains (TMs) from the SecYEG channel (Beck et al. 2001), supports their folding (Zhu, Kaback and Dalbey 2013; Serdiuk et al. 2016) and controls the correct topology of membrane proteins (Nagamori, Smirnova and Kaback 2004).

The SecYEG channel is also engaged in the post-translational transport of secretory proteins, which are targeted by the ATPase SecA after their release from the ribosome (Muller et al. 2001; de Keyzer, van der Does and Driessen 2003; Alami et al. 2007; Fig. 1). SecA exhibits a dual function during transport of secretory proteins; it serves as a targeting factor, which requires for some substrates the cooperation with the cytoplasmic chaperone SecB (Castanie-Cornet, Bruel and Genevoux 2013), and it provides the energy for translocation by repetitive ATP hydrolysis cycles (Knyazev et al. 2018). While the SRP-dependent targeting to the Sec translocon is universally conserved and essential in almost all cells (Dalbey, Koch and Kuhn 2017), the SecA-dependent targeting is present in bacteria and chloroplasts only and absent in eukaryotes and archaea (Pohlschroder et al. 2005).

### Structure of the bacterial SRP and its receptor FtsY

The bacterial SRP is a ribonucleoprotein complex that contains a single and highly conserved GTPase subunit that is homologous to the eukaryotic SRP54 subunit and thus named Ffh (Fifty-four-homologue; Miller, Bernstein and Walter 1994). Ffh is bound to either 4.5S RNA in gram-negative bacteria or to 6S RNA in gram-positive bacteria (Rosenblad et al. 2003; Fig. 2). Accessory proteins interacting with the bacterial SRP have been described for *Bacillus subtilis* and *Streptococcus mutans*. In *B. subtilis*, the histone-like protein HBSu was suggested to be part of SRP (Nakamura et al. 1999), but *in vitro* analyses did not reveal significant binding of HBSu to SRP (Beckert et al. 2015). YlxM was identified as component of the *S. mutans* SRP and seems to regulate GTP hydrolysis (Williams et al. 2014). However, the exact functions of these accessory proteins have to be further explored.

The bacterial SRP receptor (SR) FtsY is also composed of a single GTPase subunit. Although most bacterial SR lack a TM, they are tightly bound to the cytoplasmic membrane by virtue of lipid- and SecY-binding sites (Mircheva et al. 2009). Besides Ffh and FtsY, some bacterial species contain a third SRP-like GTPase, termed FlhF (Bange et al. 2007; Bange et al. 2011), which appears to be dispensable for protein transport (Zanen et al. 2004), but rather controls the number and position of flagella (Schuhmacher, Thormann and Bange 2015).

Both FtsY and Ffh consist of three domains each and their respective N- and G-domains show striking similarities in terms of architecture and amino acid sequence (Fig. 2). The N-domain forms a bundle of four helices that is followed by the Ras-like GTPase G-domain (Freyman et al. 1997; Montoya et al. 1997). Different to many other GTPases, Ffh and FtsY are stable in the absence of nucleotides and show only small conformational changes upon nucleotide binding (Freyman et al. 1997;

Montoya et al. 1997; Freyman et al. 1999; Gawronski-Salerno and Freyman 2007). Their intrinsically low GTPase activity is stimulated upon Ffh-FtsY complex formation via their NG domains. This forms a composite GTP-hydrolysis site that promotes reciprocal GTP hydrolysis at the end of the targeting reaction (Kusters et al. 1995; Egea et al. 2004; Focia et al. 2004; Bange and Sinning 2013; Fig. 2).

The non-homologous third domains of Ffh and FtsY execute particular functions during the targeting reaction. The C-terminal methionine-rich M-domain of Ffh is flexibly connected to the NG domain by a 30 amino acid-long linker and serves as binding site for signal sequences and contacts the SRP RNA (Spanggard et al. 2005; Halic et al. 2006; Janda et al. 2010; Hainzl et al. 2011). Five amphipathic  $\alpha$ -helices ( $\alpha$ M1 to  $\alpha$ M5) at the C-terminus of the M-domain form a hydrophobic signal sequence binding groove, which can be closed by a finger-loop located between  $\alpha$ M1 and  $\alpha$ M2 (Hainzl et al. 2011) and the flexible  $\alpha$ M5 (Jomaa et al. 2016).

The third domain in FtsY is the N-terminal A-domain, containing a large number of acidic residues. While the M-domain in Ffh is absolutely essential for SRP function, the A-domain is present primarily in FtsY homologues of gram-negative bacteria and absent in gram-positive bacteria and atypical bacteria like *Mycoplasma*, *Mycobacterium* or *Spirochaetes* (Kakeshita et al. 2000; Dong, Jiang and Li 2009). Even in gram-negative bacteria there is limited sequence and length conservation of the A-domain and deleting the A-domain does not prevent targeting *in vivo* and *in vitro* (Eitan and Bibi 2004; Weiche et al. 2008). Although not essential, the 198 amino acid long A-domain in *Escherichia coli* executes important functions. It contains an amphipathic lipid-binding helix at the very N-terminus (Weiche et al. 2008; Braig et al. 2009) and binding sites for the SecYEG translocon (Angelini, Deitermann and Koch 2005; Kuhn et al. 2011; Kuhn et al. 2015). The C-terminus of the A-domain also facilitates the folding of a second amphipathic lipid binding helix at the interface of the A- and N-domains (Stjepanovic et al. 2011). Thus, the A-domain serves to stabilize the essential membrane contact of FtsY (de Leeuw et al. 2000; Mircheva et al. 2009; Erez et al. 2010; Lam et al. 2010). Even in its absence, the essential lipid-binding helix at the A-N interface (Parlitz et al. 2007; Braig et al. 2011; Stjepanovic et al. 2011) and additional SecY-binding sites within the NG domains (Kuhn et al. 2015) are sufficient for maintaining efficient co-translational targeting. Recent data demonstrate that the A-domain also prevents futile SRP-FtsY interactions in the absence of an available SecYEG translocon (Draycheva et al. 2016). This is in line with a recent Cryo-EM structure, in which a domain presumably reflecting the A-domain was localized close to the SecYEG translocon (Jomaa et al. 2017). Why in particular gram-negative bacteria require the A-domain remains an open question.

The third component of the SRP system is the SRP RNA. The RNA is essential for SRP function, but differs remarkably in size and structure. Initially considered to merely serve as a scaffold for Ffh, it is now evident that the RNA is a catalytic component that regulates GTP hydrolysis of the SRP-FtsY complex (Peluso et al. 2001; Ariosa et al. 2013). The 4.5S SRP RNA of *E. coli* is composed of 115 nucleotides and forms a hairpin-like structure (Jagath et al. 2001; Gu et al. 2005) with six internal loops and the conserved GGAA tetra-loop at the closed end (Fig. 2). The loops A and B are located close to the tetra-loop and bind to a helix-turn-helix motif within the M-domain of SRP. The SRP RNA of many gram-positive bacteria is larger (270 nucleotides in *B. subtilis*) and contains in contrast to gram-negative bacteria an Alu-domain (exceptions are e.g. *Mycobacterium tuberculosis* or *Corynebacterium glutamicum*; Regalia, Rosenblad and

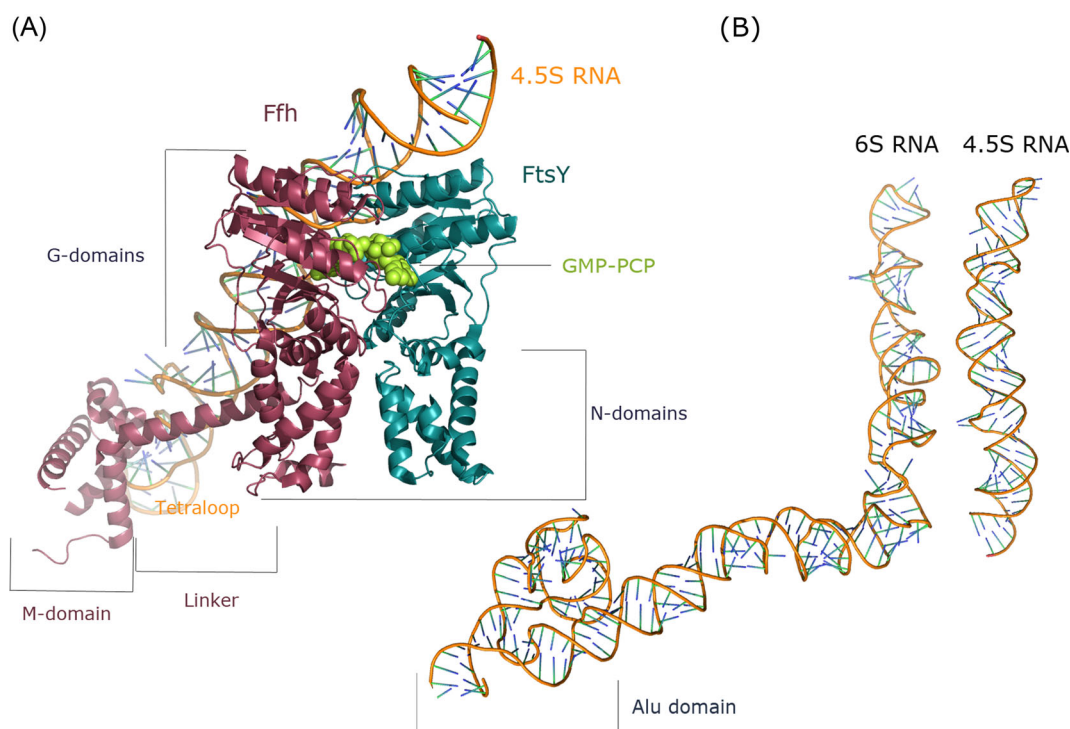

**Figure 2.** Structure of the bacterial SRP components. (A) Crystal structure of *E. coli* SRP in complex with its receptor FtsY (Ataide et al. 2011, pdb: 2XXA). Ffh, the GTPase protein subunit of SRP is displayed in red, in complex with the NG domains of its receptor FtsY, depicted in blue. The non-hydrolysable GTP analogue GMPPCP (green) is also indicated. A 30 amino acid long linker connects the NG-core of Ffh to its C-terminal methionine rich M-domain that provides the binding sites for the SAS and the SRP RNA, shown in green. The tetra-loop of 4.5S RNA regulates GTP hydrolysis of the SRP–FtsY complex. The last C terminal 21 amino acid residues of Ffh are not depicted. The 198 amino acid long acidic A-domain of FtsY, present primarily in gram-negative bacteria, is disordered and has not been crystallized so far. (B) Comparison of *Deinococcus radiourans* 4.5S RNA (Ataide et al. 2011, pdb: 2XXA) and *B. subtilis* 6S RNA (Beckert et al. 2015, pdb: 4UE4). The 4.5S RNA of gram-negative bacteria is about half the size of the 6S RNA, present in most gram-positive bacteria. The Alu-domain of the 6S RNA, which is involved in translation regulation, is indicated.

Samuelsson 2002). This domain decelerates translation, likely via competition with elongation factor binding to the ribosome (Beckert et al. 2015), thus providing a time window for efficient membrane targeting of RNCs by SRP (Koch, Moser and Muller 2003). Although shorter and lacking the Alu-domain, the 4.5S RNA can complement the depletion of the 6S RNA in *B. subtilis* and restore viability (Nakamura et al. 1992).

In contrast to the Alu-domain of the eukaryotic SRP, the bacterial Alu-domain is protein-free with large RNA-extensions (Kempf, Wild and Sinning 2014), and the translational arrest activity of the *B. subtilis* Alu-domain largely depends on RNA-RNA interactions (Beckert et al. 2015). Different to the SRP of eukaryotes and gram-positive bacteria, a translational arrest activity by SRP in gram-negative bacteria has not been described, even though SRP and its sub-domains reduce membrane protein expression when over-expressed (Yosef, Bochkareva and Bibi 2010). An alternative model for adjusting translational speed to co-translational targeting is codon-usage. Indeed, local slow-down of translation by non-optimal codons and translational pause sites promote RNC recognition by SRP in bacteria and eukaryotes (Chartier, Gaudreault and Najmanovich 2012; Fluman et al. 2014; Pechmann, Chartron and Frydman 2014).

### Ribosome binding and substrate selection by SRP

Co-translational targeting is initiated by SRP contacting the ribosome for subsequent decoding of the information retained within the emerging nascent protein. On the ribosomal surface,

SRP establishes three contacts next to the ribosomal tunnel exit (Halic et al. 2006; Schaffitzel et al. 2006; Jomaa et al. 2016), which seem to be conserved across species: the NG domain binds in close vicinity to the ribosomal proteins uL29 and uL23 (Pool et al. 2002; Gu et al. 2003; Jomaa et al. 2016). uL23 is also contacted by the M-domain (Halic et al. 2006; Schaffitzel et al. 2006; Jomaa et al. 2016) that furthermore extensively interacts with the 23S rRNA of the bacterial ribosome. The 4.5S RNA of SRP contacts bL32, a ribosomal protein that is only found in bacteria (Jomaa et al. 2016; Fig. 3).

Membrane proteins contain a unique identification tag at the N-terminus, called the signal anchor sequence (SAS), which distinguishes them from secretory proteins and cytosolic proteins (Driessen and Nouwen 2008). The SAS is not a defined amino acid sequence, but rather a consecutive stretch of hydrophobic and bulky aromatic residues. These residues are flanked by basic residues at the N-terminal side and polar residues on the C-terminal side (Pugsley 1990; von Heijne 1994; Hegde and Bernstein 2006). As such, these SAS appear to be not much different from signal sequences of secretory proteins. Indeed, it is largely the increased hydrophobicity and the absence of helix-breaking amino acids (Lee and Bernstein 2001; Adams et al. 2002; Beha et al. 2003; Zhang et al. 2010; Petersen et al. 2011) that distinguishes SAS from signal sequences. In addition and reflecting its particular name, SAS lack a signal peptidase cleavage site and usually serve as first TM for anchoring the protein in the membrane. In contrast, signal sequences of secretory proteins are usually cleaved after translocation by signal peptidase-1 (Hegde and Bernstein 2006). Finally, recent data

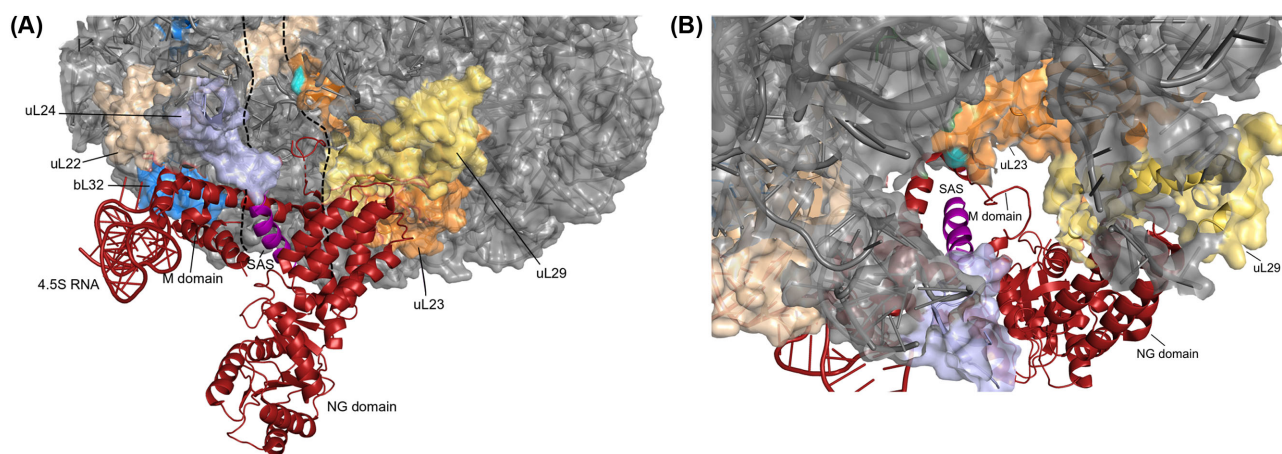

**Figure 3.** Atomic model of the SRP-RNC interaction. Cryo-electron microscopy structure of the SRP-RNC complex (adapted from Jomaa et al. 2016; pdb: 5GAF). (A) The ribosomal surface is shown in gray and the ribosomal peptide tunnel is marked with dashed lines. The ribosomal proteins uL22 (wheat), uL23 (orange), uL24 (light violet) and uL29 (yellow) are located at the lower part of the ribosomal tunnel and surround the ribosomal tunnel exit. The NG and M-domain, as well as the 4.5S RNA of SRP, are displayed in red. The ribosomal protein bL32 (blue) is contacted by the 4.5S RNA, whereas uL23 and uL29 are interacting with both the M- and NG domains of SRP. The signal anchor sequence (SAS) is shown in purple. The C-terminus of the M-domain extends into the ribosomal tunnel getting close to the intra-tunnel hairpin loop of uL23 (position 71 at the loop tip is marked in green). Note that helix  $\alpha$ M5 at the very C-terminus of the Ffh M-domain, which was shown to interact with position 71 of uL23 by cross-linking (Denks et al. 2017), is not depicted in the structure. (B) Top view of the ribosomal tunnel. The SAS as well as the loop of the C-terminal M-domain of Ffh (lacking the  $\alpha$ M5 helix) are located inside of the ribosomal tunnel.

demonstrate that information within the mature part of secretory proteins also contributes to their efficient targeting (Chatzi et al. 2017). Whether SRP-dependent targeting is also influenced by sequence information down-stream of the SAS is currently unknown.

SRP contacts to both the ribosome and to the SAS are prerequisites for co-translational targeting, but the timing and coordination of these contacts were subjects of controversial discussions. The initial proposal based on work with eukaryotic SRP suggested that SRP identifies its substrates after the SAS is completely exposed to the outside of the ribosomal exit tunnel (Walter, Ibrahim and Blobel 1981). Recent re-investigations using single-molecule fluorescence energy transfer to monitor SRP-binding to actively translating bacterial ribosomes and ribosome profiling data supported these earlier findings (Noriega et al. 2014; Noriega et al. 2014; Schibich et al. 2016). However, various other studies demonstrated a much earlier interaction of the eukaryotic and bacterial SRP with non-translating ribosomes (Bornemann et al. 2008) and short RNCs in which the nascent protein was completely shielded within the ribosomal tunnel (Houben et al. 2005; Berndt et al. 2009; Voorhees and Hegde 2015). Even membrane targeting was shown to occur without a fully exposed SAS (Bornemann et al. 2008; Holtkamp et al. 2012). Recent kinetic analyses describe the SRP-RNC interaction as a multi-step process and find early SRP recruitment before emerging of a SAS using both stalled RNCs and actively translating ribosomes (Bornemann et al. 2008; Holtkamp et al. 2012; Mercier et al. 2017). A first moderate-affinity intermediate SRP-RNC complex is detected early and independently of the presence or exposure of a SAS. This intermediate is rapidly followed by a rearrangement to a more stable complex in which SRP awaits the emerging SAS (Mercier et al. 2017). Once the SAS is completely exposed, i.e. when the nascent chain reaches a length of approx. 45 amino acids, the affinity for SRP is further increased (Denks et al. 2017), resulting in a kinetically stable complex that can initiate the subsequent delivery to FtsY. This increase in stability of SRP in complex with ribosomes bearing a nascent chain, compared to SRP binding to non-translating ribosomes, is mainly mediated by a decrease in the dissociation rate ( $1 \text{ s}^{-1}$  versus  $10 \text{ s}^{-1}$ ) of SRP

from the ribosome (Bornemann et al. 2008; Holtkamp et al. 2012). The early interaction between SRP and the ribosome is therefore characterized by a high dissociation rate that could reflect an early rapid scanning mode of SRP for possible substrates. This might explain how the small amount of SRP molecules can efficiently scan the large excess of ribosomes in the bacterial cell. When contacting translating ribosomes, the dissociation rate is lowered as the nascent chain further emerges, switching to a stand-by complex that probably primes SRP for binding the SAS. As soon as a SAS is recognized, the stability is further increased (dissociation rate:  $0.08 \text{ s}^{-1}$ ) and targeting is initiated (Bornemann et al. 2008; Holtkamp et al. 2012).

*In vivo* and *in vitro* crosslinking data confirm the concept of an early, SAS-independent interaction of SRP with RNCs. In these studies it was shown that the C-terminus of Ffh (helix  $\alpha$ M5) inserts into the ribosomal tunnel of non-translating ribosomes to contact an intra-tunnel hairpin-loop of the ribosomal protein uL23 (Denks et al. 2017; Fig. 4). Once the nascent chain reaches a length of approx. 25 amino acids, SRP retracts from the intra-tunnel loop into the proximal part of the tunnel and the intra-tunnel loop now contacts the nascent chain. Importantly, this step was independent of a SAS. The retraction of the C-terminus probably orients SRP in such a way that the emerging SAS now makes stable contact with the C-terminal M-domain (Denks et al. 2017). This activates SRP for the subsequent binding to FtsY (Bornemann et al. 2008; Buskiewicz et al. 2009). The insertion of the C-terminus of Ffh into the ribosomal tunnel was also visible in a recent high-resolution Cryo-electron microscopy study (Jomaa et al. 2016), providing further evidence for this model. In the absence of a correct SAS, SRP dissociates and scans the next ribosome. A recent study on SRP-RNC interaction in yeast also supports early ribosome binding of SRP, but further suggests that non-coding regions within the mRNA also influence SRP recruitment (Geiger et al. 2016). The discrepancy between the SAS-dependent and -independent SRP-binding models is probably explained by the low stability of early SRP-ribosome interactions. In particular, the cross-linking approach as non-equilibrium method favors the detection of labile intermediates by covalent stabilization.

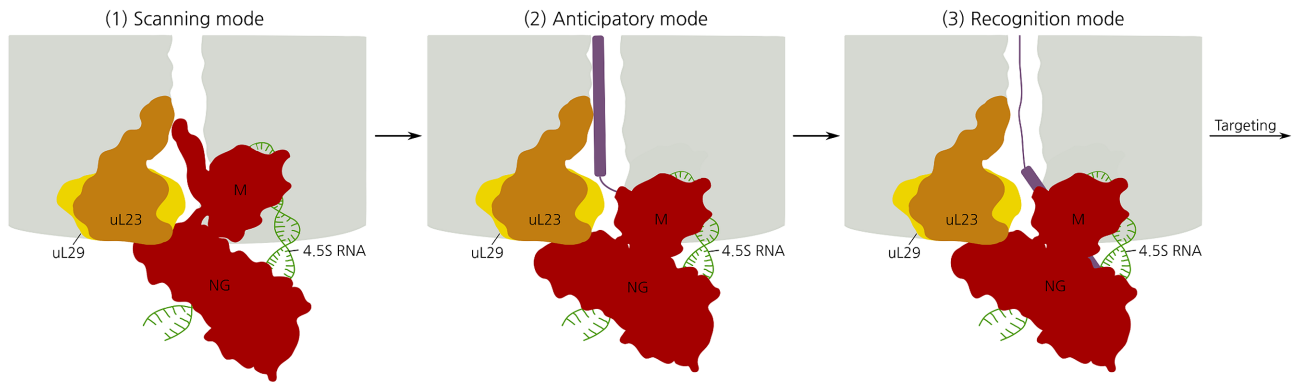

**Figure 4.** Schematic view of the different interaction states between SRP and ribosomes during different stages of substrate recognition (modified from Denks et al. 2017). When contacting vacant ribosomes (light gray), the flexible C-terminal part of the M-domain of SRP (red) is inserted into the ribosomal tunnel and contacts the loop-tip of the ribosomal protein uL23 (orange). This reflects an early scanning mode of SRP. That contact is replaced by the emerging nascent chain (purple) and SRP retracts into the proximal part of the tunnel anticipating an emerging SAS. Once the SAS is completely or almost completely exposed, stable binding of SRP to the SAS enables SRP to subsequently target the RNC to the SecYEG-bound SR FtsY.

Expectedly, there are deviations from the canonical system described above (Table 1). SRP sometimes fails to recognize the first TM but rather binds a downstream TM or it binds to membrane protein substrates multiple times (Schibich et al. 2016). As skipped TMs generally have a lower hydrophobicity, the interaction of SRP with these TMs might be too weak to be detected. Multiple binding events on the other hand could suggest re-targeting of RNCs that have lost contact to the SecYEG translocon or YidC during insertion (Kuroiwa et al. 1996). Some membrane proteins have cleavable signal sequences, like the ammonium transporter AtmB (Khademi et al. 2004), and their targeting and insertion mode is unexplored. In other membrane proteins, like KdpD, the first TM is preceded by a long cytosolic domain, which contains amphipathic stretches that are recognized by SRP (Maier et al. 2008), demonstrating that SRP recognition is not limited to TMs. This is also supported by the observation that SRP can bind to particularly hydrophobic signal sequences of secretory proteins and even to amphipathic helices of cytosolic proteins (Huber et al. 2005; Zhou, Ueda and Muller 2014; Schibich et al. 2016). Among the cytosolic proteins bound by SRP are the partially membrane associated proteins DnaK (Schibich et al. 2016) and  $\sigma^{32}$  (Lim et al. 2013). *Escherichia coli* contains a few tail-anchored proteins (Borgese and Righi 2010), i.e. proteins that are membrane-anchored by a C-terminal TM that is only accessible after translation termination. Their targeting and insertion pathway is still largely unexplored, but SRP is involved in their transport as well (Pross et al. 2016; Peschke et al. 2017). Finally, bacteria contain an increasing number of small membrane proteins (<50 amino acids; Fontaine, Fuchs and Storz 2011; Storz, Wolf and Ramamurthi 2014). These are suggested to depend on either YidC or SecYEG for insertion (Fontaine, Fuchs and Storz 2011), but whether they require SRP/FtsY is unknown.

### Targeting of nascent membrane proteins for insertion

After substrate recognition, SRP delivers its cargo to the cytoplasmic membrane via the interaction with its receptor FtsY. The timing of this SRP-RNC-FtsY interaction was also initially controversially discussed, owing to the fact that FtsY, in contrast to the eukaryotic SR, lacks a TM that would tether it permanently to the cytoplasmic membrane in bacteria. Cell fractionation studies had shown that FtsY is found at the membrane and in the soluble fraction (Luirink et al. 1994), raising the possibility that FtsY would first associate with the SRP-RNC in the cy-

tosol and only then target the membrane (Saraogi, Akopian and Shan 2014). In support of this assumption, the FtsY association with SRP or SRP-RNCs in solution has been shown in multiple studies and was crucial for the biochemical and structural characterization of distinct conformational changes during the targeting reaction (Jagath, Rodnina and Wintermeyer 2000; Ataide et al. 2011; Estrozi et al. 2011; von Loeffelholz et al. 2013; von Loeffelholz et al. 2015). Still, the lipid- and SecY-binding sites in FtsY tether it almost exclusively to the membrane *in vivo* (Mircheva et al. 2009) and the association of FtsY with lipids (Lam et al. 2010; Braig et al. 2011; Stjepanovic et al. 2011) and the SecYEG translocon (Angelini, Deitermann and Koch 2005; Akopian et al. 2013; Kuhn et al. 2015; Draycheva et al. 2016) is a prerequisite for high-affinity SRP binding. The preference of FtsY for anionic phospholipids (de Leeuw et al. 2000; Braig et al. 2009; Erez et al. 2010; Lam et al. 2010), which are enriched in close vicinity to the SecYEG translocon (Gold et al. 2010; Prabudiansyah et al. 2015), likely enhances targeting efficiency by increasing the local concentration of FtsY close to SecYEG.

FtsY binds to the cytosolic loops C4 and C5 of SecY and thus occupies the ribosome-binding site of the SecYEG translocon (Kuhn et al. 2011). Binding occurs with high affinity ( $K_D = 0.18 \mu\text{M}$ ) and is lipid-dependent as described above, but nucleotide-independent (Kuhn et al. 2015). Considering approx. 10 000 FtsY copies and approx. 500 SecYEG copies per *E. coli* cell (Kudva et al. 2013), only a fraction of FtsY can be in direct contact with SecY. The number of FtsY molecules in complex with SecYEG is further reduced because SecA and ribosomes bind to the same cytosolic loops of SecY (Kuhn et al. 2011). Thus, contacts between SecYEG and FtsY are likely highly dynamic and the FtsY molecules not bound to SecYEG are bound to either phospholipids (Weiche et al. 2008; Braig et al. 2009) or YidC (Welte et al. 2012; Petriman et al. 2018). The contact of FtsY to SecYEG induces the movement of the A-domain away from the NG domain resulting in the exposure of the SRP-binding site on FtsY (Draycheva et al. 2016). This observation is consistent with earlier observations that only the SecYEG-bound FtsY is competent for efficient SRP recruitment (Mircheva et al. 2009). This domain separation is one of several check-points during the SRP-targeting cycle that ensures effective substrate delivery to SecYEG (Bornemann et al. 2008; Holtkamp et al. 2012; Saraogi, Akopian and Shan 2014). However, it is important to emphasize that the A-domain is not conserved in all bacterial species and therefore the SRP-binding site of FtsY in these species is not

**Table 1.** Diversity of targeting and membrane insertion strategies for membrane proteins (MPs) in bacteria.

| Topology                                                                            | Type and examples                                            | Targeting        |                  | Insertion/Translocation |                  |                  | References                                                    |
|-------------------------------------------------------------------------------------|--------------------------------------------------------------|------------------|------------------|-------------------------|------------------|------------------|---------------------------------------------------------------|
|                                                                                     |                                                              | SRP              | SecA             | Sec YEG                 | YidC             | SecA             |                                                               |
|    | <b>Phage proteins</b><br><br>Pf3coat                         | +                | -                | -                       | +                | -                | Chen et al. (2002)                                            |
|    | <b>S-MPs<sup>a</sup></b><br><br>YoaJ<br>YkgR<br>YoaK<br>YohP | ?<br>?<br>?<br>? | ?<br>?<br>?<br>? | +<br>+<br>-<br>-        | +<br>-<br>+<br>- | ?<br>?<br>?<br>? | Fontaine, Fuchs and Storz (2011)                              |
|    | <b>Single-spanning MPs</b><br><br>FtsQ                       | +                | -                | +                       | *                | +                | van der Laan, Nouwen and Driessen (2004)                      |
|    | RodZ                                                         | -                | +                | +                       | ?                | +                | Rawat et al. (2015); Wang, Yang and Shan (2017)               |
|  | <b>C-tail anchored MPs</b><br><br>SciP, Flk, DjlC            | +                | -                | -                       | +                | -                | Pross et al. (2016); Peschke et al. (2017)                    |
|  | <b>Double-spanning MPs</b><br><br>MscL                       | +                | -                | ? <sup>b</sup>          | +                | -                | Facey et al. (2007) Komar et al. (2016)                       |
|  | F <sub>0</sub> C                                             | ? <sup>c</sup>   | -                | ? <sup>d</sup>          | +                | -                | Yi et al. (2004); van Bloois et al (2004); Komar et al (2016) |
|  | <b>Multi-spanning MPs</b><br><br>KdpD                        | +                | -                | -                       | -                | -                | Maier et al. (2008); Facey et al. (2003)                      |
|  | MtlA                                                         | +                | -                | + <sup>e</sup>          | + <sup>e</sup>   | -                | Koch et al. (1999); Welte et al. (2012)                       |

Table 1. continued

| Topology                                                                          | Type and examples | Targeting |      | Insertion/Translocation |                |      | References                              |
|-----------------------------------------------------------------------------------|-------------------|-----------|------|-------------------------|----------------|------|-----------------------------------------|
|                                                                                   |                   | SRP       | SecA | Sec YEG                 | YidC           | SecA |                                         |
| 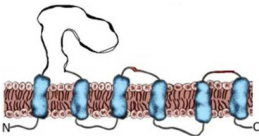 | YidC              | +         | -    | +                       | -              | +    | Koch et al. (2002); Welte et al. (2012) |
|  | TatC              | +         | -    | + <sup>e</sup>          | + <sup>e</sup> | -    | Welte et al. (2012); Zhu et al. (2012)  |

(Steinberg et al., Table 1)

Shown are the demonstrated or predicted topologies of different types of membrane proteins and their experimentally verified targeting and insertion mechanism. (+) required; (\*) involved, e.g. YidC involvement during folding of SecYEG-inserted membrane proteins; (-) not required; (?) unknown or conflicting data.

<sup>a</sup>S-MPs refer to small membrane proteins of less than 50 amino acids; their insertion was studied with SPA-tagged variants.

<sup>b</sup>In a reconstituted system, a SecYEG-mediated insertion of MscL was shown (Komar et al. 2016).

<sup>c,d</sup>Both SRP-dependent (van Bloois et al. 2004) and in-dependent targeting (Yi et al. 2004) of F<sub>0</sub>C was shown; slightly higher insertion efficiency was observed with a SecYEG–YidC–SecDF complex (Komar et al. 2016).

<sup>e</sup>SRP can target MtlA and TatC to either SecYEG or YidC for insertion (Welte et al. 2012).

shielded. Whether these bacteria use other means to prevent SRP–FtsY interaction in the absence of an available SecYEG translocon is unknown.

The activation of FtsY by lipid-embedded SecYEG and the activation of SRP by binding to the SAS guide into the next step of the targeting reaction: the formation of a quaternary SecYEG–FtsY–SRP–RNC complex (Saraogi, Akopian and Shan 2014; Kuhn et al. 2015; Jomaa et al. 2017). This involves a series of conformational rearrangements, which finally lead to the reciprocal GT-Pase activation. However, it is important to note that the early conformational FtsY–SRP rearrangements were determined only in solution, i.e. in the absence of membranes and the SecYEG translocon. First, the SRP–RNC and the SR form an unstable intermediate (early intermediate) that is based on electrostatic interactions between the respective N-domains of FtsY and Ffh (Estrozi et al. 2011; Zhang et al. 2011) and on contacts between the tetra-loop of 4.5S RNA and FtsY (Jagath et al. 2001; Zhang, Kung and Shan 2008). In this early interaction state incorrect substrates can still be recognized and rejected from the SRP pathway. In this case the SRP–RNC–FtsY complex dissociates (von Loeffelholz et al. 2013). In presence of a correct substrate, the complex is stabilized to a closed state mediated by conformational changes of the respective NG domains (Egea et al. 2004; Shan, Stroud and Walter 2004). As a consequence of this FtsY–SRP interaction, FtsY is partially displaced from SecY, leading to the exposure of the ribosome binding site on SecY. Likewise, SRP movements on the RNCs expose the translocon-binding site on the ribosome (Pool et al. 2002; Halic et al. 2006), which favors the stable contact between the RNC and the SecYEG translocon and the subsequent insertion of the nascent membrane protein into the lipid bilayer. The concomitant GTP-hydrolysis by the SRP–FtsY complex finally leads to its disassembly (Kusters et al. 1995; Akopian et al. 2013; Bange and Sinning 2013; Voigts-Hoffmann et al. 2013), releasing SRP into the cytosol, whereas FtsY remains bound to SecYEG or lipids (Kuhn et al. 2015; Mercier et al. 2017).

SRP and FtsY deliver substrates not only to the SecYEG translocon but also to the YidC insertase (Dalbey, Koch and Kuhn 2017). This was shown for proteins like MscL or F<sub>0</sub>C that are suggested to strictly require YidC for insertion (van Bloois et al.

2004; Facey et al. 2007) and for proteins like MtlA or TatC that can be inserted *in vitro* by either SecYEG or YidC (Welte et al. 2012; Table 1). Thus, SRP does not necessarily discriminate between SecYEG and YidC substrates, which would be anyway difficult to imagine as SRP binds to its substrates before substantial information about the substrate is available. RNCs bind to the cytosolic loop C2 and the C-terminus of YidC (Kohler et al. 2009; Kedrov et al. 2013; Kedrov et al. 2016), but the affinity of YidC for non-translating ribosomes is rather low compared to SecYEG (Welte et al. 2012; Kedrov et al. 2013). Only YidC variants with C-terminal extensions have a high intrinsic affinity for non-translating ribosomes. These YidC variants are found in some marine bacteria (Seitl et al. 2014) and in some gram-positive bacteria like *Streptococcus* (Hasona et al. 2005; Dong et al. 2008; Funes et al. 2009), and are termed YidC2. Strikingly, *S. mutans* is one of the few organisms that survives the inactivation of the SRP pathway (Hasona et al. 2005), likely because the C-terminus of YidC2 provides enough specificity for ribosome binding to maintain cell survival even in the absence of a targeting system.

YidC also binds FtsY and SRP (Welte et al. 2012), but SecYEG appears to be the preferred binding partner of FtsY (Petriman et al. 2018). This is in line with the observation that protein insertion into YidC-proteoliposomes does not strictly require FtsY (Welte et al. 2012), while FtsY is absolutely essential for insertion into SecYEG-proteoliposomes (Braig et al. 2011). Further studies are required for determining whether SRP-dependent targeting to YidC mimics the targeting to SecYEG or shows differences. Variations in the SRP cycle and FtsY requirements during targeting to SecYEG or YidC could explain data indicating alternative ways of ribosome-targeting to the bacterial membrane (Bibi 2011). In this scenario, FtsY is co-translationally targeted to the membrane (Bercovich-Kinori and Bibi 2015), whereby the pool of membrane-bound ribosomes is increased (Herskovits et al. 2001; Herskovits et al. 2002; Bahari et al. 2007). These ribosomes could translate mRNAs encoding membrane proteins that were targeted to the membrane independently of translation (Nevo-Dinur et al. 2011), but the subsequent insertion would still require SRP (Yosef, Bochkareva and Bibi 2010).



## SecA, another ribosome-interacting targeting factor?

SecA-dependent targeting of secretory proteins is generally considered to occur post-translationally (Lee and Beckwith 1986; Mori and Ito 2001; Chatzi et al. 2013), but this view is challenged by several observations. The interaction of SecA with RNCs of secretory proteins was first observed in cell-free *in vitro* studies (Eisner et al. 2003; Karamyshev and Johnson 2005) and a dual role of SecA in the targeting/insertion of short RNCs and during the translocation of periplasmic loops of membrane proteins was also noticed (Neumann-Haefelin et al. 2000; van der Laan, Nouwen and Driessen 2004; Deitermann, Sprie and Koch 2005; Fig. 5). Later, SecA was shown to bind to the ribosome in close vicinity of the ribosomal tunnel (Huber et al. 2011; Singh et al. 2014) and to long RNCs of the secretory maltose-binding protein *in vivo* (Huber et al. 2017). The observation that the SecA interaction requires extended nascent chains (>110 amino acids) is interesting, as this is also the RNC length that allows maximal interaction of the chaperone trigger factor (Oh et al. 2011), which is generally considered to be the first contact of a nascent secretory protein (Kramer et al. 2002; Ito 2005; Calloni et al. 2012).

The early interaction of SecA with secretory proteins is yet another example that living cells usually do not follow black-and-white classifications. This is even more evident when looking at recent data which demonstrate that SecA is also involved in the co-translational targeting and insertion of the single-spanning membrane protein RodZ (Rawat et al. 2015; Wang, Yang and Shan 2017), confirming previous data on a potential role of SecA in the insertion of single-spanning membrane proteins (Deitermann, Sprie and Koch 2005). This suggests an alternative co-translational route for membrane protein targeting in bacteria that involves SecA and is independent of SRP; however, to which extent this pathway is used and which determinants route membrane proteins into this SRP-independent targeting pathway needs to be further explored. Considering that SecA binding to SecYEG follows the same principle as FtsY binding to SecYEG (Lill, Dowhan and Wickner 1990; Kuhn et al. 2011) and that both proteins bind SecY with similar affinities (Douville et al. 1995; Kuhn et al. 2015), SecA-dependent targeting of nascent membrane proteins might act as back-up system when the low-abundant SRP system is saturated.

## Biotechnological and medical relevance of co-translational targeting

Heterologous expression of membrane proteins is still a major bottle-neck for their structural and biochemical characterization. Many attempts to facilitate membrane protein expression in *E. coli* actually rely on attenuating expression for preventing membrane stress, e.g. by lowering the amounts of T7 RNA polymerase or by reducing temperature (Wagner et al. 2008; Baumgarten et al. 2017) or on *E. coli* strain optimization (Schlegel et al. 2010; Kuipers et al. 2017). Improving heterologous membrane protein expression by modulating their targeting and insertion might be a promising alternative. Increasing the cellular YidC levels improved the expression of two archaeal rhodopsins in *E. coli*, but increasing the SRP concentration reduced their yield (Nannenga and Baneyx 2011). Reduced membrane protein expression upon SRP-overproduction was also observed for endogenous membrane proteins (Yosef, Bochkareva and Bibi 2010) and was suggested to prevent the overflow of the limited SecYEG channels (Nannenga and Baneyx 2012). This could reflect a translational arrest activity of the *E. coli* SRP, but the underlying mechanism is unknown. Over-expression of SecYEG

is usually also not well tolerated, but enhanced production of vitamin K epoxide reductase was observed when the substrate-binding groove of YidC was modified (Hatahet et al. 2015). Thus, improving YidC-dependent membrane protein folding and computationally guided sequence optimization are promising ways for improving membrane protein expression (Norholm et al. 2012; Norholm et al. 2013; Marshall et al. 2016; Niesen et al. 2017).

Exploring the protein targeting and transport machinery as targets for novel antibacterials has gained momentum during the last years (Rao et al. 2014; Van Puyenbroeck and Vermeire 2018). Three major targets have so far been identified: the motor protein SecA (Chaudhary et al. 2015; De Waelheyns et al. 2015), signal peptides (De Waelheyns et al. 2015) and the SecYEG translocon (Junne et al. 2015). Even though specific inhibitors of SRP, FtsY and YidC could not be isolated, down-regulation of YidC sensitizes bacterial cells against antimicrobial compounds (Patil et al. 2013), and inhibitors of the RNC transfer from the SRP machinery to the Sec translocon in eukaryotes have been described (Cross et al. 2009). The therapeutic potentials of these compounds have to be further explored, but they definitely offer exciting new avenues for treating bacterial infections.

## CONCLUSION AND OUTLOOK

Research on bacterial protein transport has seen tremendous progress during the last years. The structures of all of the key components have been determined and, in combination with detailed biochemical analyses, this now permits a deep insight into the molecular processes that ensure the specific substrate delivery to the bacterial cytoplasmic membrane. And yet, many questions are still unresolved and new questions arise. The co-translational targeting by SRP and FtsY is almost exclusively studied in *Escherichia coli* by using a limited number of model substrates. Its contribution to the transport of non-canonical substrates, like small membrane proteins (Storz, Wolf and Ramamurthi 2014), C-tail-anchored proteins (Pross et al. 2016; Peschke et al. 2017) and proteins that seem to insert independently of SecYEG or YidC (Facey and Kuhn 2003) needs to be further explored. Ribosome profiling studies have determined the global SRP interactome in *E. coli* (Schibich et al. 2016) that provides the framework for further validation, but also needs to be extended to other species. Studies on the SRP-dependent targeting to YidC (Welte et al. 2012) are still in its infancy and it remains to be seen whether it indeed follows the pathway explored for targeting to SecYEG. The influence of translational speed and codon usage on SRP recognition (Pechmann, Chartron and Frydman 2014) is another topic that has been barely touched. The ribosomal tunnel exit is a rather crowded place and multiple targeting factors, chaperones and processing factors bind to it; how their access to the nascent protein is coordinated is still subject of ongoing research (Ito et al. 2011; Sandikci et al. 2013; Bornemann, Holtkamp and Wintermeyer 2014; Ranjan et al. 2017). The SRP pathway is considered essential to most bacteria, but then how do bacteria like *Leptospira sp.* survive in the absence of an SRP system (Fouts et al. 2016)? Alternative targeting strategies for membrane proteins have recently emerged and the importance of the SecA-ribosome interaction and the prevalence of SecA-dependent membrane protein targeting is another unresolved issue (Huber et al. 2017; Wang, Yang and Shan 2017). Likewise, the translation-independent membrane targeting of mRNAs encoding membrane proteins and the transfer of their products to SecYEG or YidC for insertion are open questions (Bibi 2011). Finally, the spatial organization of the targeting and insertion

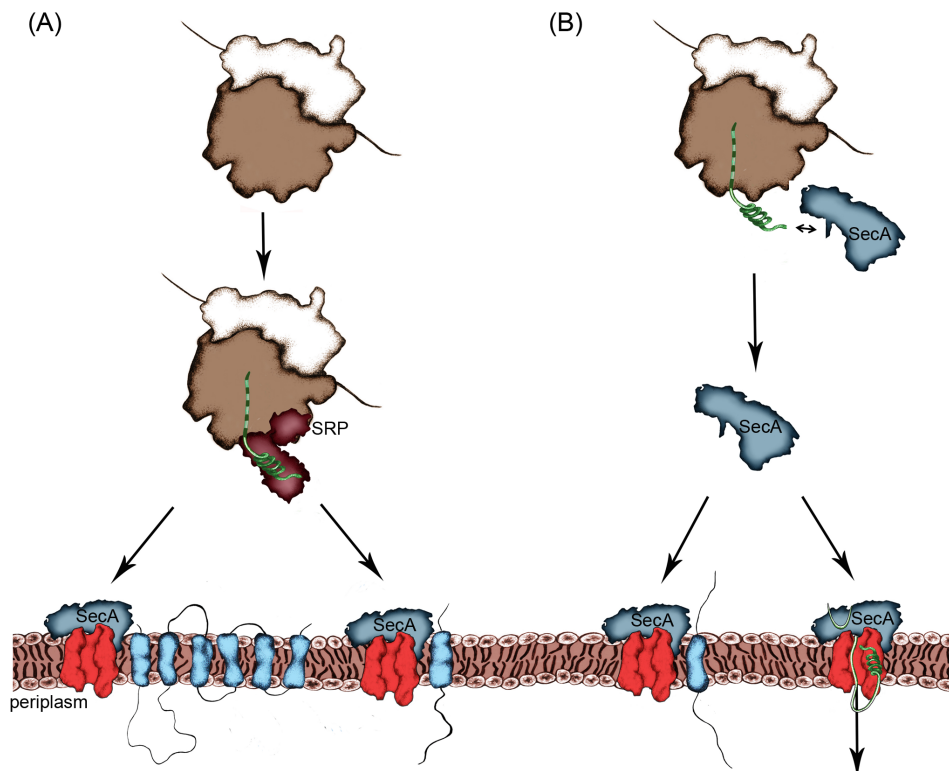

**Figure 5.** The contribution of SecA to membrane protein insertion in *E. coli*. (A) Membrane proteins harboring extended periplasmic domains require SecA for the translocation of these loops. This has been shown for multi-spanning membrane proteins like YidC (left panel) and for single-spanning membrane proteins like FtsQ (right panel). These proteins are targeted co-translationally by SRP to the SecYEG translocon (red). Whether SecA (blue) translocates the periplasmic loops after synthesis is terminated or during synthesis is not known. (B) SecA can also recognize its substrates co-translationally. This has been shown for the single-spanning membrane protein RodZ (left panel), which is targeted and inserted independently of the SRP pathway. Whether canonical SecA substrates like periplasmic proteins (right panel) can also be recognized and targeted by SecA co-translationally is currently unknown.

machinery in bacterial cells is only beginning to emerge (Campo *et al.* 2004; Govindarajan and Amster-Choder 2017). Thus, despite all the progress, bacterial protein transport remains a fascinating topic for research that holds the promise for more surprises.

## ACKNOWLEDGEMENT

We gratefully acknowledge the contribution of Narcis-Adrian Petriman during Figure preparation.

## FUNDING

This work was supported by grants from the Deutsche Forschungsgemeinschaft (RTG 2202, SPP2002; KO2184/8), the Else-Kröner Fresenius Stiftung (MOTIVATE MD College) and the FF-Nord foundation.

*Conflict of interest.* None declared.

## REFERENCES

- Adams H, Scotti PA, De Cock H *et al.* The presence of a helix breaker in the hydrophobic core of signal sequences of secretory proteins prevents recognition by the signal-recognition particle in *Escherichia coli*. *Eur J Biochem* 2002;**269**: 5564–71.
- Akopian D, Shen K, Zhang X *et al.* Signal recognition particle: an essential protein-targeting machine. *Annu Rev Biochem* 2013;**82**:693–721.
- Akopian D, Dalal K, Shen K *et al.* SecYEG activates GTPases to drive the completion of cotranslational protein targeting. *J Cell Biol* 2013;**200**:397–405.
- Alami M, Dalal K, Leij-Garolla B *et al.* Nanodiscs unravel the interaction between the SecYEG channel and its cytosolic partner SecA. *EMBO J* 2007;**26**:1995–2004.
- Angelini S, Deitermann S, Koch HG. FtsY, the bacterial signal-recognition particle receptor, interacts functionally and physically with the SecYEG translocon. *EMBO Rep* 2005;**6**:476–81.
- Ariosa AR, Duncan SS, Saraogi I *et al.* Fingerloop activates cargo delivery and unloading during cotranslational protein targeting. *Mol Biol Cell* 2013;**24**:63–73.
- Ataide SF, Schmitz N, Shen K *et al.* The crystal structure of the signal recognition particle in complex with its receptor. *Science* 2011;**331**:881–6.
- Baba T, Jacq A, Brickman E *et al.* Characterization of cold-sensitive secY mutants of *Escherichia coli*. *J Bacteriol* 1990;**172**:7005–10.
- Bahari L, Parilitz R, Eitan A *et al.* Membrane targeting of ribosomes and their release require distinct and separable functions of FtsY. *J Biol Chem* 2007;**282**:32168–75.
- Bange G, Sinning I. SIMIBI twins in protein targeting and localization. *Nat Struct Mol Biol* 2013;**20**:776–80.
- Bange G, Petzold G, Wild K *et al.* The crystal structure of the third signal-recognition particle GTPase FlhF reveals a homodimer with bound GTP. *P Natl Acad Sci USA* 2007;**104**: 13621–5.

- Bange G, Kummerer N, Grudnik P et al. Structural basis for the molecular evolution of SRP-GTPase activation by protein. *Nat Struct Mol Biol* 2011;**18**:1376–80.
- Baumgarten T, Schlegel S, Wagner S et al. Isolation and characterization of the *E. coli* membrane protein production strain Mutant56(DE3). *Sci Rep* 2017;**7**:45089.
- Beck K, Eisner G, Trescher D et al. YidC, an assembly site for polytopic *Escherichia coli* membrane proteins located in immediate proximity to the SecYE translocon and lipids. *EMBO Rep* 2001;**2**:709–14.
- Beckert B, Kedrov A, Sohmen D et al. Translational arrest by a prokaryotic signal recognition particle is mediated by RNA interactions. *Nat Struct Mol Biol* 2015;**22**:767–73.
- Beha D, Deitermann S, Muller M et al. Export of beta-lactamase is independent of the signal recognition particle. *J Biol Chem* 2003;**278**:22161–7.
- Bercovich-Kinori A, Bibi E. Co-translational membrane association of the *Escherichia coli* SRP receptor. *J Cell Sci* 2015;**128**:1444–52.
- Berndt U, Oellerer S, Zhang Y et al. A signal-anchor sequence stimulates signal recognition particle binding to ribosomes from inside the exit tunnel. *P Natl Acad Sci USA* 2009;**106**:1398–403.
- Bernstein HD, Poritz MA, Strub K et al. Model for signal sequence recognition from amino-acid sequence of 54K subunit of signal recognition particle. *Nature* 1989;**340**:482–6.
- Bibi E. Early targeting events during membrane protein biogenesis in *Escherichia coli*. *BBA-Biomembranes* 2011;**1808**:841–50.
- Borgese N, Righi M. Remote origins of tail-anchored proteins. *Traffic* 2010;**11**:877–85.
- Bornemann T, Holtkamp W, Wintermeyer W. Interplay between trigger factor and other protein biogenesis factors on the ribosome. *Nat Comms* 2014;**5**:4180.
- Bornemann T, Jockel J, Rodnina MV et al. Signal sequence-independent membrane targeting of ribosomes containing short nascent peptides within the exit tunnel. *Nat Struct Mol Biol* 2008;**15**:494–9.
- Braig D, Bar C, Thumfart JO et al. Two cooperating helices constitute the lipid-binding domain of the bacterial SRP receptor. *J Mol Biol* 2009;**390**:401–13.
- Braig D, Mircheva M, Sachelaru I et al. Signal sequence-independent SRP-SR complex formation at the membrane suggests an alternative targeting pathway within the SRP cycle. *Mol Biol Cell* 2011;**22**:2309–23.
- Buskiewicz IA, Jockel J, Rodnina MV et al. Conformation of the signal recognition particle in ribosomal targeting complexes. *RNA* 2009;**15**:44–54.
- Calloni G, Chen T, Schermann SM et al. DnaK functions as a central hub in the *E. coli* chaperone network. *Cell Reports* 2012;**1**:251–64.
- Campo N, Tjalsma H, Buist G et al. Subcellular sites for bacterial protein export. *Mol Microbiol* 2004;**53**:1583–99.
- Castanie-Cornet MP, Bruel N, Genevaux P. Chaperone networking facilitates protein targeting to the bacterial cytoplasmic membrane. *Biochim Biophys Acta* 2013;**1843**(8):1442–56.
- Chartier M, Gaudreault F, Najmanovich R. Large-scale analysis of conserved rare codon clusters suggests an involvement in co-translational molecular recognition events. *Bioinformatics* 2012;**28**:1438–45.
- Chatzi KE, Sardis MF, Karamanou S et al. Breaking on through to the other side: protein export through the bacterial Sec system. *Biochem J* 2013;**449**:25–37.
- Chatzi KE, Sardis MF, Tsirigotaki A et al. Preprotein mature domains contain translocase targeting signals that are essential for secretion. *J Cell Biol* 2017;**216**:1357–69.
- Chaudhary AS, Jin J, Chen W et al. Design, syntheses and evaluation of 4-oxo-5-cyano thiouracils as SecA inhibitors. *Bioorgan Med Chem* 2015;**23**:105–17.
- Chen M, Xie K, Jiang F et al. YidC, a newly defined evolutionarily conserved protein, mediates membrane protein assembly in bacteria. *Biol Chem* 2002;**383**:1565–72.
- Cross BC, McKibbin C, Callan AC et al. Eeyarestatin I inhibits Sec61-mediated protein translocation at the endoplasmic reticulum. *J Cell Sci* 2009;**122**:4393–400.
- Dalbey R, Koch HG, Kuhn A. Targeting and insertion of membrane proteins. *EcoSal Plus* 2017;**7**:1–28.
- de Keyzer J, van der Does C, Driessen AJ. The bacterial translocase: a dynamic protein channel complex. *Cell Mol Life Sci* 2003;**60**:2034–52.
- de Leeuw E, te Kaat K, Moser C et al. Anionic phospholipids are involved in membrane association of FtsY and stimulate its GTPase activity. *EMBO J* 2000;**19**:531–41.
- De Waelheyns E, Segers K, Sardis MF et al. Identification of small-molecule inhibitors against SecA by structure-based virtual ligand screening. *J Antibiot* 2015;**68**:666–73.
- Deitermann S, Sprie GS, Koch HG. A dual function for SecA in the assembly of single spanning membrane proteins in *Escherichia coli*. *J Biol Chem* 2005;**280**:39077–85.
- Denks K, Sliwinski N, Erichsen V et al. The signal recognition particle contacts uL23 and scans substrate translation inside the ribosomal tunnel. *Nat Microbiol* 2017;**2**:16265.
- Dong HJ, Jiang JY, Li YQ. The distinct anchoring mechanism of FtsY from different microbes. *Curr Microbiol* 2009;**59**:336–40.
- Dong Y, Palmer SR, Hasona A et al. Functional overlap but lack of complete cross-complementation of *Streptococcus mutans* and *Escherichia coli* YidC orthologs. *J Bacteriol* 2008;**190**:2458–69.
- Douville K, Price A, Eichler J et al. SecYEG and SecA are the stoichiometric components of preprotein translocase. *J Biol Chem* 1995;**270**:20106–11.
- Draycheva A, Bornemann T, Ryazanov S et al. The bacterial SRP receptor, FtsY, is activated on binding to the translocon. *Mol Microbiol* 2016;**102**:152–67.
- Driessen AJ, Nouwen N. Protein translocation across the bacterial cytoplasmic membrane. *Annu Rev Biochem* 2008;**77**:643–67.
- Egea PF, Shan SO, Napetschnig J et al. Substrate twinning activates the signal recognition particle and its receptor. *Nature* 2004;**427**:215–21.
- Eisner G, Koch HG, Beck K et al. Ligand crowding at a nascent signal sequence. *J Cell Biol* 2003;**163**:35–44.
- Eitan A, Bibi E. The core *Escherichia coli* signal recognition particle receptor contains only the N and G domains of FtsY. *J Bacteriol* 2004;**186**:2492–4.
- Erez E, Stjepanovic G, Zelazny AM et al. Genetic evidence for functional interaction of the *Escherichia coli* signal recognition particle receptor with acidic lipids in vivo. *J Biol Chem* 2010;**285**:40508–14.
- Estrozi LF, Boehringer D, Shan SO et al. Cryo-EM structure of the *E. coli* translating ribosome in complex with SRP and its receptor. *Nat Struct Mol Biol* 2011;**18**:88–90.
- Facey SJ, Kuhn A. The sensor protein KdpD inserts into the *Escherichia coli* membrane independent of the Sec translocase and YidC. *Eur J Biochem* 2003;**270**:1724–34.
- Facey SJ, Neugebauer SA, Krauss S et al. The mechanosensitive channel protein MscL is targeted by the SRP to the novel

- YidC membrane insertion pathway of *Escherichia coli*. *J Mol Biol* 2007;**365**:995–1004.
- Fluman N, Navon S, Bibi E et al. mRNA-programmed translation pauses in the targeting of *E. coli* membrane proteins. *Elife* 2014;**3**:e03440.
- Focia PJ, Shepotinovskaya IV, Seidler JA et al. Heterodimeric GTPase core of the SRP targeting complex. *Science* 2004;**303**:373–7.
- Fontaine F, Fuchs RT, Storz G. Membrane localization of small proteins in *Escherichia coli*. *J Biol Chem* 2011;**286**:32464–74.
- Fouts DE, Matthias MA, Adhikarla H et al. What makes a bacterial species pathogenic?: Comparative genomic analysis of the genus *Leptospira*. *PLoS Negl Trop Dis* 2016;**10**:e0004403.
- Freymann DM, Keenan RJ, Stroud RM et al. Structure of the conserved GTPase domain of the signal recognition particle. *Nature* 1997;**385**:361–4.
- Freymann DM, Keenan RJ, Stroud DA et al. Functional changes in the structure of the SRP GTPase on binding GDP and Mg<sup>2+</sup>+GDP. *Nat Struct Biol* 1999;**6**:793–801.
- Funes S, Hasona A, Bauerschmitt H et al. Independent gene duplications of the YidC/Oxa/Alb3 family enabled a specialized cotranslational function. *P Natl Acad Sci USA* 2009;**106**:6656–61.
- Gawronski-Salerno J, Freyermann DM. Structure of the GMPPNP-stabilized NG domain complex of the SRP GTPases Ffh and FtsY. *J Struct Biol* 2007;**158**:122–8.
- Geiger MA, Linden A, van Rossum BJ et al. Cotranslational signal-independent SRP preloading during membrane targeting. *Sci Adv* 2016;**5**:36:224–8.
- Gold VA, Robson A, Bao H et al. The action of cardiolipin on the bacterial translocon. *P Natl Acad Sci USA* 2010;**107**:10044–9.
- Govindarajan S, Amster-Choder O. The bacterial Sec system is required for the organization and function of the MreB cytoskeleton. *PLoS Genet* 2017;**13**:e1007017.
- Gu SQ, Peske F, Wieden HJ et al. The signal recognition particle binds to protein L23 at the peptide exit of the *Escherichia coli* ribosome. *RNA* 2003;**9**:566–73.
- Gu SQ, Jockel J, Beinker P et al. Conformation of 4.5S RNA in the signal recognition particle and on the 30S ribosomal subunit. *RNA* 2005;**11**:1374–84.
- Hainzl T, Huang S, Merilainen G et al. Structural basis of signal-sequence recognition by the signal recognition particle. *Nat Struct Mol Biol* 2011;**18**:389–91.
- Halic M, Becker T, Pool MR et al. Structure of the signal recognition particle interacting with the elongation-arrested ribosome. *Nature* 2004;**427**:808–14.
- Halic M, Gartmann M, Schlenker O et al. Signal recognition particle receptor exposes the ribosomal translocon binding site. *Science* 2006;**312**:745–7.
- Halic M, Blau M, Becker T et al. Following the signal sequence from ribosomal tunnel exit to signal recognition particle. *Nature* 2006;**444**:507–11.
- Hasona A, Crowley PJ, Levesque CM et al. Streptococcal viability and diminished stress tolerance in mutants lacking the signal recognition particle pathway or YidC2. *P Natl Acad Sci USA* 2005;**102**:17466–71.
- Hatahet F, Blazyk JL, Martineau E et al. Altered *Escherichia coli* membrane protein assembly machinery allows proper membrane assembly of eukaryotic protein vitamin K epoxide reductase. *P Natl Acad Sci USA* 2015;**112**:15184–9.
- Hegde RS, Bernstein HD. The surprising complexity of signal sequences. *Trends Biochem Sci* 2006;**31**:563–71.
- Herskovits AA, Shimoni E, Minsky A et al. Accumulation of endoplasmic membranes and novel membrane-bound ribosome-signal recognition particle receptor complexes in *Escherichia coli*. *J Cell Biol* 2002;**159**:403–10.
- Herskovits AA, Seluanov A, Rajsbaum R et al. Evidence for coupling of membrane targeting and function of the signal recognition particle (SRP) receptor FtsY. *EMBO Rep* 2001;**2**:1040–6.
- Holtkamp W, Lee S, Bornemann T et al. Dynamic switch of the signal recognition particle from scanning to targeting. *Nat Struct Mol Biol* 2012;**19**:1332–7.
- Houben EN, Zarivach R, Oudega B et al. Early encounters of a nascent membrane protein. *J Cell Biol* 2005;**170**:27–35.
- Houben EN, ten Hagen-Jongman CM, Brunner J et al. The two membrane segments of leader peptidase partition one by one into the lipid bilayer via a Sec/YidC interface. *EMBO Rep* 2004;**5**:970–5.
- Huber D, Boy D, Xia Y et al. Use of thioredoxin as a reporter to identify a subset of *Escherichia coli* signal sequences that promote signal recognition particle-dependent translocation. *J Bacteriol* 2005;**187**:2983–91.
- Huber D, Rajagopalan N, Preissler S et al. SecA interacts with ribosomes in order to facilitate posttranslational translocation in bacteria. *Mol Cell* 2011;**41**:343–53.
- Huber D, Jamshad M, Hanmer R et al. SecA cotranslationally interacts with nascent substrate proteins in vivo. *J Bacteriol* 2017;**199**:e00622–00616.
- Ito K. Ribosome-based protein folding systems are structurally divergent but functionally universal across biological kingdoms. *Mol Microbiol* 2005;**57**:313–7.
- Ito K, Chadani Y, Nakamori K et al. Nascentome analysis uncovers futile protein synthesis in *Escherichia coli*. *PLoS One* 2011;**6**:e28413.
- Jagath JR, Rodnina MV, Wintermeyer W. Conformational changes in the bacterial SRP receptor FtsY upon binding of guanine nucleotides and SRP. *J Mol Biol* 2000;**295**:745–53.
- Jagath JR, Matassova NB, de Leeuw E et al. Important role of the tetraloop region of 4.5S RNA in SRP binding to its receptor FtsY. *RNA* 2001;**7**:293–301.
- Janda CY, Li J, Oubridge C et al. Recognition of a signal peptide by the signal recognition particle. *Nature* 2010;**465**:507–10.
- Johnson K, Murphy CK, Beckwith J. Protein export in *Escherichia coli*. *Curr Opin Biotech* 1992;**3**:481–5.
- Jomaa A, Boehringer D, Leibundgut M et al. Structures of the *E. coli* translating ribosome with SRP and its receptor and with the translocon. *Nat Comms* 2016;**7**:10471.
- Jomaa A, Boehringer D, Leibundgut M et al. Structures of the *E. coli* translating ribosome with SRP and its receptor and with the translocon. *Nat Comms* 2016;**7**:10471.
- Jomaa A, Fu YH, Boehringer D et al. Structure of the quaternary complex between SRP, SR, and translocon bound to the translating ribosome. *Nat Comms* 2017;**8**:15470.
- Junne T, Wong J, Studer C et al. Decatransin, a new natural product inhibiting protein translocation at the Sec61/SecYEG translocon. *J Cell Sci* 2015;**128**:1217–29.
- Kakeshita H, Oguro A, Amikura R et al. Expression of the ftsY gene, encoding a homologue of the alpha subunit of mammalian signal recognition particle receptor, is controlled by different promoters in vegetative and sporulating cells of *Bacillus subtilis*. *Microbiology* 2000;**146**(Pt 10):2595–603.
- Karamanou S, Vrontou E, Sianidis G et al. A molecular switch in SecA protein couples ATP hydrolysis to protein translocation. *Mol Microbiol* 1999;**34**:1133–45.
- Karamyshev AL, Johnson AE. Selective SecA association with signal sequences in ribosome-bound nascent chains. *J Biol Chem* 2005;**280**:37930–40.

- Kedrov A, Sustarsic M, de Keyzer J et al. Elucidating the native architecture of the YidC: ribosome complex. *J Mol Biol* 2013;**425**:4112–24.
- Kedrov A, Wickles S, Crevenna AH et al. Structural dynamics of the YidC:Ribosome complex during membrane protein biogenesis. *Cell Rep* 2016;**17**:2943–54.
- Kempf G, Wild K, Sinning I. Structure of the complete bacterial SRP Alu domain. *Nucleic Acids Res* 2014;**42**:12284–94.
- Khademi S, O'Connell J, 3rd, Remis J et al. Mechanism of ammonia transport by Amt/MEP/Rh: structure of AmtB at 1.35 Å. *Science* 2004;**305**:1587–94.
- Knyazev DG, Kuttner R, Zimmermann M et al. Driving forces of translocation through bacterial translocon SecYEG. *J Membrane Biol* 2018.
- Koch HG, Moser M, Schimz KL et al. The integration of YidC into the cytoplasmic membrane of *Escherichia coli* requires the signal recognition particle, SecA and SecYEG. *The Journal of biological chemistry* 2002;**277**:5715–18.
- Koch HG, Muller M. Dissecting the translocase and integrase functions of the *Escherichia coli* SecYEG translocon. *J Cell Biol* 2000;**150**:689–94.
- Koch HG, Moser M, Muller M. Signal recognition particle-dependent protein targeting, universal to all kingdoms of life. *Rev Physiol Biochem Pharmacol* 2003;**146**:55–94.
- Koch HG, Hengelage T, Neumann-Haefelin C et al. In vitro studies with purified components reveal signal recognition particle (SRP) and SecA/SecB as constituents of two independent protein-targeting pathways of *Escherichia coli*. *Mol Biol Cell* 1999;**10**:2163–73.
- Kohler R, Boehringer D, Greber B et al. YidC and Oxa1 form dimeric insertion pores on the translating ribosome. *Mol Cell* 2009;**34**:344–53.
- Komar J, Alvira S, Schulze R et al. Membrane protein insertion and assembly by the bacterial holo-translocon SecYEG-SecDF-YajC-YidC. *Biochem J* 2016.
- Kramer G, Rauch T, Rist W et al. L23 protein functions as a chaperone docking site on the ribosome. *Nature* 2002;**419**:171–4.
- Kudva R, Denks K, Kuhn P et al. Protein translocation across the inner membrane of gram-negative bacteria: the Sec and Tat dependent protein transport pathways. *Res Microbiol* 2013;**164**:505–34.
- Kuhn P, Kudva R, Welte T et al. Targeting and integration of bacterial membrane proteins. In: Remaut H, Fronzes R (eds). *Bacterial Membranes: Structural and Molecular Biology*. Norfolk: Caister Academic Press, 2014, 303–43.
- Kuhn P, Weiche B, Sturm L et al. The bacterial SRP receptor, SecA and the ribosome use overlapping binding sites on the SecY translocon. *Traffic* 2011;**12**:563–78.
- Kuhn P, Draycheva A, Vogt A et al. Ribosome binding induces repositioning of the signal recognition particle receptor on the translocon. *J Cell Biol* 2015;**211**:91–104.
- Kuipers G, Peschke M, Ismail NB et al. Optimizing *E. coli*-based membrane protein production using Lemo21(DE3) or pReX and GFP-fusions. *Method Mol Biol* 2017;**1586**:109–26.
- Kuroiwa T, Sakaguchi M, Omura T et al. Reinitiation of protein translocation across the endoplasmic reticulum membrane for the topogenesis of multispinning membrane proteins. *J Biol Chem* 1996;**271**:6423–8.
- Kusters R, Lentzen G, Eppens E et al. The functioning of the SRP receptor FtsY in protein-targeting in *E. coli* is correlated with its ability to bind and hydrolyse GTP. *FEBS Lett* 1995;**372**:253–8.
- Lam VQ, Akopian D, Rome M et al. Lipid activation of the signal recognition particle receptor provides spatial coordination of protein targeting. *J Cell Biol* 2010;**190**:623–35.
- Lee C, Beckwith J. Cotranslational and posttranslational protein translocation in prokaryotic systems. *Annu Rev Cell Biol* 1986;**2**:315–32.
- Lee HC, Bernstein HD. The targeting pathway of *Escherichia coli* presecretory and integral membrane proteins is specified by the hydrophobicity of the targeting signal. *P Natl Acad Sci USA* 2001;**98**:3471–6.
- Lill R, Dowhan W, Wickner W. The ATPase activity of secA is regulated by acidic phospholipids, secY, and the leader and mature domains of precursor proteins. *Cell* 1990;**60**:271–80.
- Lim B, Miyazaki R, Neher S et al. Heat shock transcription factor sigma32 co-opts the signal recognition particle to regulate protein homeostasis in *E. coli*. *PLoS Biol* 2013;**11**:e1001735.
- Luirink J, ten Hagen-Jongman CM, van der Weijden CC et al. An alternative protein targeting pathway in *Escherichia coli*: studies on the role of FtsY. *EMBO J* 1994;**13**:2289–96.
- Maier KS, Hubich S, Liebhar H et al. An amphiphilic region in the cytoplasmic domain of KdpD is recognized by the signal recognition particle and targeted to the *Escherichia coli* membrane. *Mol Microbiol* 2008;**68**:1471–84.
- Marshall SS, Niesen MJM, Muller A et al. A link between integral membrane protein expression and simulated integration efficiency. *Cell Rep* 2016;**16**:2169–77.
- Mercier E, Holtkamp W, Rodnina MV et al. Signal recognition particle binds to translating ribosomes before emergence of a signal anchor sequence. *Nucleic Acids Res* 2017;**45**:11858–66.
- Miller JD, Bernstein HD, Walter P. Interaction of *E. coli* Ffh/4.5S ribonucleoprotein and FtsY mimics that of mammalian signal recognition particle and its receptor. *Nature* 1994;**367**:657–9.
- Mircheva M, Boy D, Weiche B et al. Predominant membrane localization is an essential feature of the bacterial signal recognition particle receptor. *BMC Biol* 2009;**7**:76.
- Montoya G, Svensson C, Luirink J et al. Crystal structure of the NG domain from the signal-recognition particle receptor FtsY. *Nature* 1997;**385**:365–8.
- Mori H, Ito K. The Sec protein-translocation pathway. *Trends Microbiol* 2001;**9**:494–500.
- Muller M, Koch HG, Beck K et al. Protein traffic in bacteria: multiple routes from the ribosome to and across the membrane. *Prog Nucleic Acid Res Mol Biol* 2001;**66**:107–57.
- Nagamori S, Smirnova IN, Kaback HR. Role of YidC in folding of polytopic membrane proteins. *J Cell Biol* 2004;**165**:53–62.
- Nakamura K, Imai Y, Nakamura A et al. Small cytoplasmic RNA of *Bacillus subtilis*: functional relationship with human signal recognition particle 7S RNA and *Escherichia coli* 4.5S RNA. *J Bacteriol* 1992;**174**:2185–92.
- Nakamura K, Yahagi S, Yamazaki T et al. *Bacillus subtilis* histone-like protein, HBSu, is an integral component of a SRP-like particle that can bind the Alu domain of small cytoplasmic RNA. *J Biol Chem* 1999;**274**:13569–76.
- Nannenga BL, Baneyx F. Reprogramming chaperone pathways to improve membrane protein expression in *Escherichia coli*. *Protein Sci* 2011;**20**:1411–20.
- Nannenga BL, Baneyx F. Folding engineering strategies for efficient membrane protein production in *E. coli*. *Method Mol Biol* 2012;**899**:187–202.
- Neumann-Haefelin C, Schafer U, Muller M et al. SRP-dependent co-translational targeting and SecA-dependent

- translocation analyzed as individual steps in the export of a bacterial protein. *EMBO J* 2000;**19**:6419–26.
- Nevo-Dinur K, Nussbaum-Shochat A, Ben-Yehuda S et al. Translation-independent localization of mRNA in *E. coli*. *Science New York* 2011;**331**:1081–4.
- Niesen MJM, Marshall SS, Miller TF, 3rd et al. Improving membrane protein expression by optimizing integration efficiency. *J Biol Chem* 2017;**292**:19537–45.
- Norholm MH, Light S, Virkki MT et al. Manipulating the genetic code for membrane protein production: What have we learnt so far? *BBA-Biomembranes* 2012;**1818**:1091–6.
- Norholm MH, Toddo S, Virkki MT et al. Improved production of membrane proteins in *Escherichia coli* by selective codon substitutions. *FEBS Lett* 2013;**587**:2352–8.
- Noriega TR, Chen J, Walter P et al. Real-time observation of signal recognition particle binding to actively translating ribosomes. *Elife* 2014;**3**:eLife.04418.
- Noriega TR, Tsai A, Elvekrog MM et al. Signal recognition particle-ribosome binding is sensitive to nascent chain length. *J Biol Chem* 2014;**289**:19294–305.
- Oh E, Becker AH, Sandikci A et al. Selective ribosome profiling reveals the cotranslational chaperone action of trigger factor in vivo. *Cell* 2011;**147**:1295–308.
- Parlitz R, Eitan A, Stjepanovic G et al. *Escherichia coli* signal recognition particle receptor FtsY contains an essential and autonomous membrane-binding amphipathic helix. *J Biol Chem* 2007;**282**:32176–84.
- Patil SD, Sharma R, Srivastava S et al. Downregulation of yidC in *Escherichia coli* by antisense RNA expression results in sensitization to antibacterial essential oils eugenol and carvacrol. *PLoS One* 2013;**8**:e57370.
- Pechmann S, Chartron JW, Frydman J. Local slowdown of translation by nonoptimal codons promotes nascent-chain recognition by SRP in vivo. *Nat Struct Mol Biol* 2014;**21**:1100–5.
- Peluso P, Shan SO, Nock S et al. Role of SRP RNA in the GTPase cycles of Ffh and FtsY. *Biochemistry* 2001;**40**:15224–33.
- Peschke M, Le Goff M, Koningstein GM et al. SRP, FtsY, DnaK and YidC are required for the biogenesis of the *E. coli* tail-anchored membrane proteins DjlC and Flk. *J Mol Biol* 2017;**16**:226.
- Petersen TN, Brunak S, von Heijne G et al. SignalP 4.0: discriminating signal peptides from transmembrane regions. *Nat Methods* 2011;**8**:785–6.
- Petriman NA, Jauss B, Hufnagel A et al. The interaction network of the YidC insertase with the SecYEG translocon, SRP and the SRP receptor FtsY. *Sci Rep* 2018;**8**:578.
- Pohlschroder M, Hartmann E, Hand NJ et al. Diversity and evolution of protein translocation. *Annu Rev Microbiol* 2005;**59**:91–111.
- Pool MR, Stumm J, Fulga TA et al. Distinct modes of signal recognition particle interaction with the ribosome. *Science (New York, NY)* 2002;**297**:1345–8.
- Powers T, Walter P. Co-translational protein targeting catalyzed by the *Escherichia coli* signal recognition particle and its receptor. *EMBO J* 1997;**16**:4880–6.
- Prabudiansyah I, Kusters I, Caforio A et al. Characterization of the annular lipid shell of the Sec translocon. *BBA-Biomembranes* 2015;**1848**:2050–6.
- Pross E, Soussoula L, Seitz I et al. Membrane targeting and insertion of the C-tail protein SciP. *J Mol Biol* 2016;**428**:4218–27.
- Pugsley AP. Translocation of proteins with signal sequences across membranes. *Curr Opin Cell Biol* 1990;**2**:609–16.
- Ranjan A, Mercier E, Bhatt A et al. Signal recognition particle prevents N-terminal processing of bacterial membrane proteins. *Nat Comms* 2017;**8**:15562.
- Rao CVS, De Waelheyns E, Economou A et al. Antibiotic targeting of the bacterial secretory pathway. *BBA-Mol Cell Res* 2014;**1843**:1762–83.
- Rapoport TA, Li L, Park E. Structural and mechanistic insights into protein translocation. *Annu Rev Cell Dev Biol* 2017;**33**:369–90.
- Rawat S, Zhu L, Lindner E et al. SecA drives transmembrane insertion of RodZ, an unusual single-span membrane protein. *J Mol Biol* 2015;**427**:1023–37.
- Regalia M, Rosenblad MA, Samuelsson T. Prediction of signal recognition particle RNA genes. *Nucleic Acids Res* 2002;**30**:3368–77.
- Rodnina MV, Wintermeyer W. Protein elongation, co-translational folding and targeting. *J Mol Biol* 2016;**428**:2165–85.
- Romisch K, Webb J, Herz J et al. Homology of 54K protein of signal-recognition particle, docking protein and two *E. coli* proteins with putative GTP-binding domains. *Nature* 1989;**340**:478–82.
- Rosenblad MA, Gorodkin J, Knudsen B et al. SRPDB: signal recognition particle database. *Nucleic Acids Res* 2003;**31**:363–4.
- Sachelaru I, Petriman NA, Kudva R et al. YidC occupies the lateral gate of the SecYEG translocon and is sequentially displaced by a nascent membrane protein. *J Biol Chem* 2013;**288**:16295–307.
- Sachelaru I, Winter L, Knyazev DG et al. YidC and SecYEG form a heterotetrameric protein translocation channel. *Sci Rep* 2017;**7**:101.
- Samuelson JC, Chen M, Jiang F et al. YidC mediates membrane protein insertion in bacteria. *Nature* 2000;**406**:637–41.
- Sandikci A, Gloge F, Martinez M et al. Dynamic enzyme docking to the ribosome coordinates N-terminal processing with polypeptide folding. *Nat Struct Mol Biol* 2013;**20**:843–50.
- Saraogi I, Akopian D, Shan SO. Regulation of cargo recognition, commitment, and unloading drives cotranslational protein targeting. *J Cell Biol* 2014;**205**:693–706.
- Schaffitzel C, Oswald M, Berger I et al. Structure of the *E. coli* signal recognition particle bound to a translating ribosome. *Nature* 2006;**444**:503–6.
- Schibich D, Gloge F, Pohner I et al. Global profiling of SRP interaction with nascent polypeptides. *Nature* 2016;**536**:219–23.
- Schlegel S, Klepsch M, Gialama D et al. Revolutionizing membrane protein overexpression in bacteria. *Microb Biotechnol* 2010;**3**:403–11.
- Schuhmacher JS, Thormann KM, Bange G. How bacteria maintain location and number of flagella? *FEMS Microbiol Rev* 2015;**39**:812–22.
- Scotti PA, Urbanus ML, Brunner J et al. YidC, the *Escherichia coli* homologue of mitochondrial Oxa1p, is a component of the Sec translocase. *EMBO J* 2000;**19**:542–9.
- Seitz I, Wickles S, Beckmann R et al. The C-terminal regions of YidC from *Rhodospirillum rubrum* and *Oceanicaulis alexandrii* bind to ribosomes and partially substitute for SRP receptor function in *Escherichia coli*. *Mol Microbiol* 2014;**91**:408–21.
- Serdiuk T, Balasubramaniam D, Sugihara J et al. YidC assists the stepwise and stochastic folding of membrane proteins. *Nat Chem Biol* 2016.
- Shan SO, Stroud RM, Walter P. Mechanism of association and reciprocal activation of two GTPases. *PLoS Biol* 2004;**2**:911–7.

- Singh R, Kraft C, Jaiswal R et al. Cryo-electron microscopic structure of SecA protein bound to the 70S ribosome. *J Biol Chem* 2014;**289**:7190–9.
- Spangord RJ, Siu F, Ke A et al. RNA-mediated interaction between the peptide-binding and GTPase domains of the signal recognition particle. *Nat Struct Mol Biol* 2005;**12**:1116–22.
- Stjepanovic G, Kapp K, Bange G et al. Lipids trigger a conformational switch that regulates signal recognition particle (SRP)-mediated protein targeting. *J Biol Chem* 2011;**286**:23489–97.
- Storz G, Wolf YI, Ramamurthi KS. Small proteins can no longer be ignored. *Annu Rev Biochem* 2014;**83**:753–77.
- Tomkiewicz D, Nouwen N, van Leeuwen R et al. SecA supports a constant rate of preprotein translocation. *J Biol Chem* 2006;**281**:15709–13.
- Tsirigotaki A, De Geyter J, Sostaric N et al. Protein export through the bacterial Sec pathway. *Nat Rev Micro* 2017;**15**:21–36.
- Tsukazaki T, Mori H, Echizen Y et al. Structure and function of a membrane component SecDF that enhances protein export. *Nature* 2011;**474**:235–8.
- Valent QA, Scotti PA, High S et al. The *Escherichia coli* SRP and SecB targeting pathways converge at the translocon. *EMBO J* 1998;**17**:2504–12.
- van Bloois E, Jan Haan G, de Gier JW et al. F(1)F(0) ATP synthase subunit c is targeted by the SRP to YidC in the *E. coli* inner membrane. *FEBS Lett* 2004;**576**:97–100.
- van der Laan M, Nouwen N, Driessen AJ. SecYEG proteoliposomes catalyze the Deltaphi-dependent membrane insertion of FtsQ. *J Biol Chem* 2004;**279**:1659–64.
- Van Puyenbroeck V, Vermeire K. Inhibitors of protein translocation across membranes of the secretory pathway: novel antimicrobial and anticancer agents. *Cell Mol Life Sci* 2018;**75**:1541–58.
- Voigts-Hoffmann F, Schmitz N, Shen K et al. The structural basis of FtsY recruitment and GTPase activation by SRP RNA. *Mol Cell* 2013.
- von Heijne G. Signals for protein targeting into and across membranes. *Subcell Biochem* 1994;**22**:643–54.
- von Loeffelholz O, Jiang Q, Ariosa A et al. Ribosome–SRP–FtsY cotranslational targeting complex in the closed state. *P Natl Acad Sci USA* 2015;**112**:3943–8.
- von Loeffelholz O, Knoops K, Ariosa A et al. Structural basis of signal sequence surveillance and selection by the SRP–FtsY complex. *Nat Struct Mol Biol* 2013;**20**:604–10.
- Voorhees RM, Hegde RS. Structures of the scanning and engaged states of the mammalian SRP-ribosome complex. *Elife* 2015;**4**.
- Wagner S, Klepsch MM, Schlegel S et al. Tuning *Escherichia coli* for membrane protein overexpression. *P Natl Acad Sci USA* 2008;**105**:14371–6.
- Walter P, Ibrahimi I, Blobel G. Translocation of proteins across the endoplasmic reticulum. I. Signal recognition protein (SRP) binds to in-vitro-assembled polysomes synthesizing secretory protein. *J Cell Biol* 1981;**91**:545–50.
- Wang S, Yang CI, Shan SO. SecA mediates cotranslational targeting and translocation of an inner membrane protein. *J Cell Biol* 2017;**216**:3639–53.
- Weiche B, Burk J, Angelini S et al. A cleavable N-terminal membrane anchor is involved in membrane binding of the *Escherichia coli* SRP receptor. *J Mol Biol* 2008;**377**:761–73.
- Welte T, Kudva R, Kuhn P et al. Promiscuous targeting of polytopic membrane proteins to SecYEG or YidC by the *Escherichia coli* signal recognition particle. *Mol Biol Cell* 2012;**23**:464–79.
- Williams ML, Crowley PJ, Hasona A et al. YlxM is a newly identified accessory protein that influences the function of signal recognition particle pathway components in *Streptococcus mutans*. *J Bacteriol* 2014;**196**:2043–52.
- Yi L, Celebi N, Dalbey RE. Sec/SRP requirements and energetics of membrane insertion of subunits a, b, and c of the *Escherichia coli* F1F0 ATP synthase. *The Journal of biological chemistry* 2004;**279**:39260–67.
- Yosef I, Bochkareva ES, Bibi E. *Escherichia coli* SRP, its protein subunit Ffh, and the Ffh M domain are able to selectively limit membrane protein expression when overexpressed. *MBio* 2010;**1**:e00020–10.
- Yuan J, Zweers JC, van Dijl JM et al. Protein transport across and into cell membranes in bacteria and archaea. *Cell Mol Life Sci* 2010;**67**:179–99.
- Zanen G, Antelmann H, Westers H et al. FlhF, the third signal recognition particle-GTPase of *Bacillus subtilis*, is dispensable for protein secretion. *J Bacteriol* 2004;**186**:5956–60.
- Zhang X, Kung S, Shan SO. Demonstration of a multistep mechanism for assembly of the SRP-SRP receptor complex: implications for the catalytic role of SRP RNA. *J Mol Biol* 2008;**381**:581–93.
- Zhang X, Rashid R, Wang K et al. Sequential checkpoints govern substrate selection during cotranslational protein targeting. *Science* 2010;**328**:757–60.
- Zhang X, Lam VQ, Mou Y et al. Direct visualization reveals dynamics of a transient intermediate during protein assembly. *P Natl Acad Sci USA* 2011;**108**:6450–5.
- Zhou Y, Ueda T, Muller M. Signal recognition particle and SecA cooperate during export of secretory proteins with highly hydrophobic signal sequences. *PLoS One* 2014;**9**:e92994.
- Zhu L, Kaback HR, Dalbey RE. YidC protein, a molecular chaperone for LacY protein folding via the SecYEG protein machinery. *J Biol Chem* 2013;**288**:28180–94.
- Zhu L, Klenner C, Kuhn A et al. Both YidC and SecYEG are required for translocation of the periplasmic loops 1 and 2 of the multispreading membrane protein TatC. *J Mol Biol* 2012;**424**:354–67.
